# Supplementary material
Source: HighWire-hosted journal article supplement (https://ebm.bmj.com/content/26/3/107)

# **Title: Biomarkers and in-patient outcomes of COVID-19 hospitalizations- Systematic review and Meta-analysis**

## **Supplemental File: Cut-off values for the biomarkers considered by the studies**

| <b>Biomarker</b>                                                                                                                                                                                                                                                                                                                                                                                                                                                                                                                                                                                                                                                                                                                                                                                                                                                                                                                                                                                                                                                                                                                                                                                                                                                                                                                                                                                                                                                                                                                                                                                               | <b>Cut-off values*</b>        |
|----------------------------------------------------------------------------------------------------------------------------------------------------------------------------------------------------------------------------------------------------------------------------------------------------------------------------------------------------------------------------------------------------------------------------------------------------------------------------------------------------------------------------------------------------------------------------------------------------------------------------------------------------------------------------------------------------------------------------------------------------------------------------------------------------------------------------------------------------------------------------------------------------------------------------------------------------------------------------------------------------------------------------------------------------------------------------------------------------------------------------------------------------------------------------------------------------------------------------------------------------------------------------------------------------------------------------------------------------------------------------------------------------------------------------------------------------------------------------------------------------------------------------------------------------------------------------------------------------------------|-------------------------------|
| Lymphopenia <sup>a</sup>                                                                                                                                                                                                                                                                                                                                                                                                                                                                                                                                                                                                                                                                                                                                                                                                                                                                                                                                                                                                                                                                                                                                                                                                                                                                                                                                                                                                                                                                                                                                                                                       | <1500/ $\mu$ L                |
| Thrombocytopenia <sup>a</sup>                                                                                                                                                                                                                                                                                                                                                                                                                                                                                                                                                                                                                                                                                                                                                                                                                                                                                                                                                                                                                                                                                                                                                                                                                                                                                                                                                                                                                                                                                                                                                                                  | <150,000/ $\mu$ L             |
| Alanine aminotransferase (ALT)                                                                                                                                                                                                                                                                                                                                                                                                                                                                                                                                                                                                                                                                                                                                                                                                                                                                                                                                                                                                                                                                                                                                                                                                                                                                                                                                                                                                                                                                                                                                                                                 | >40 U/L                       |
| Aspartate aminotransferase (AST)                                                                                                                                                                                                                                                                                                                                                                                                                                                                                                                                                                                                                                                                                                                                                                                                                                                                                                                                                                                                                                                                                                                                                                                                                                                                                                                                                                                                                                                                                                                                                                               | >40 U/L                       |
| C-reactive Protein (CRP) <sup>a</sup>                                                                                                                                                                                                                                                                                                                                                                                                                                                                                                                                                                                                                                                                                                                                                                                                                                                                                                                                                                                                                                                                                                                                                                                                                                                                                                                                                                                                                                                                                                                                                                          | >10 mg/L                      |
| Procalcitonin <sup>a</sup>                                                                                                                                                                                                                                                                                                                                                                                                                                                                                                                                                                                                                                                                                                                                                                                                                                                                                                                                                                                                                                                                                                                                                                                                                                                                                                                                                                                                                                                                                                                                                                                     | $\geq$ 0.5 ng/mL <sup>a</sup> |
| Lactate Dehydrogenase (LDH) <sup>a</sup>                                                                                                                                                                                                                                                                                                                                                                                                                                                                                                                                                                                                                                                                                                                                                                                                                                                                                                                                                                                                                                                                                                                                                                                                                                                                                                                                                                                                                                                                                                                                                                       | >250 U/L                      |
| Creatinine kinase (CK) <sup>a</sup>                                                                                                                                                                                                                                                                                                                                                                                                                                                                                                                                                                                                                                                                                                                                                                                                                                                                                                                                                                                                                                                                                                                                                                                                                                                                                                                                                                                                                                                                                                                                                                            | >200 U/L                      |
| Creatinine <sup>a</sup>                                                                                                                                                                                                                                                                                                                                                                                                                                                                                                                                                                                                                                                                                                                                                                                                                                                                                                                                                                                                                                                                                                                                                                                                                                                                                                                                                                                                                                                                                                                                                                                        | $\geq$ 1.5 mg/dL              |
| D-dimer <sup>a</sup>                                                                                                                                                                                                                                                                                                                                                                                                                                                                                                                                                                                                                                                                                                                                                                                                                                                                                                                                                                                                                                                                                                                                                                                                                                                                                                                                                                                                                                                                                                                                                                                           | $\geq$ 0.5 mg/L               |
| <p>Reference values are taken from <sup>a</sup>Guan et al., <sup>a</sup>Du et al.</p> <p><sup>a</sup>&lt;1100/<math>\mu</math>L in Du et al., Xu et al., Khamis et al., Wan et al., Wang et al., Jun 2020, Deng et al., Zhang et al., Feb 2020, Zhang et al., Jun 2020; &lt;800/<math>\mu</math>L in Jang et al., Zhou et al., Zheng et al., Mar 2020, Zhang et al., Jul 2020.</p> <p><sup>a</sup>&lt;125,000/<math>\mu</math>L in Xu et al., Zhang et al., Jul 2020, Khamis et al., Wan et al.; &lt;100,000/<math>\mu</math>L in Jiang et al., Zhou et al., and Zheng et al., Mar 2020</p> <p><sup>a</sup>&gt;3 mg/L in Zhang et al. Feb 2020; &gt;5 mg/L in Jang et al.; &gt;6 mg/L in Khamis et al.; <math>\geq</math>8 mg/L- Zheng et al., Mar 2020, Shahriarirad et al.; &gt;15 mg/L Mikami et al.</p> <p><sup>a</sup>&gt;0.05ng/mL in Zhang et al., Jul 2020; <math>\geq</math>0.1 ng/mL in Huang et. al., May 2020, Zhang et al. Feb 2020.</p> <p><sup>a</sup>&gt;225 U/L in Zheng et al., Mar 2020; &gt;440 U/L in Mikami et al.; &gt;550 U/L in Jang et al.</p> <p><sup>a</sup>&gt;145 U/L in Jang et al.; &gt;185 U/L in Jiang et al.; &gt;310 U/L in Wang et al., Jun 2020.</p> <p><sup>a</sup>&gt;0.9mg/dL in Jang et al.; &gt;0.96 mg/dL in Li et al.; &gt;1.1 mg/dL in Wan et al.; <math>\geq</math>1.18mg/dL in Deng et al.; &gt;1.2 mg/dL in Shahriarirad et al.; &gt;1.26 mg/dL in Wang et al., Jun 2020; <math>\geq</math>1.3 mg/dL in Wei et al.</p> <p><sup>a</sup>&gt;0.243mg/L in Zhang et al., Feb 2020; &gt;1 mg/L in Li et al., Wang et al. Jun 2020; &gt;2 mg/L in Mikami et al.</p> |                               |

**Supplemental file: Risk of bias of included studies**

| Study                     | Newcastle–Ottawa Scale |               |          | Overall risk of bias |
|---------------------------|------------------------|---------------|----------|----------------------|
|                           | Selection              | Comparability | Exposure |                      |
| Huang et al., Jan 2020    | ***                    | *             | **       | Low                  |
| Guan et al., Feb 2020     | ****                   | *             | *        | Low                  |
| Wang et al., Feb 2020     | **                     | *             | *        | Moderate             |
| Zhang et al., Feb 2020    | ***                    | *             | **       | Low                  |
| Wang et al., Mar 2020     | ***                    | *             | **       | Low                  |
| Zhou et al., Mar 2020     | **                     | *             | *        | Moderate             |
| Chen et al., Mar 2020     | ***                    | *             | **       | Low                  |
| Zheng et al., Mar 2020    | ****                   | *             | *        | Low                  |
| Colaneri et al., Apr 2020 | **                     | *             | *        | Moderate             |
| Zhao et al., Apr 2020     | ***                    | *             | **       | Low                  |
| Paranjpe et al., Apr 2020 | ***                    | *             | **       | Low                  |
| Goyal et al., Apr 2020    | **                     | *             | *        | Moderate             |
| Wan et al., Apr 2020      | **                     | *             | *        | Moderate             |
| Zhang et al., Apr 2020    | ***                    | *             | **       | Low                  |
| Zheng et al., May 2020    | ****                   | *             | *        | Low                  |
| Hong et al., May 2020     | ***                    | *             | **       | Low                  |
| Huang et. al., May 2020   | ****                   | *             | **       | Low                  |
| Wang et. al., May 2020    | ***                    | *             | ***      | Low                  |
| Du et al., May 2020       | ****                   | *             | **       | Low                  |
| Deng et al., Jun 2020     | **                     | *             | *        | Moderate             |
| Jang et al., Jun 2020     | ****                   | *             | **       | Low                  |
| Khamis et al., Jun 2020   | **                     | *             | *        | Moderate             |

|                               |      |   |    |          |
|-------------------------------|------|---|----|----------|
| Mikami et al., Jun 2020       | **   | * | *  | Moderate |
| Shahriarirad et al., Jun 2020 | **** | * | ** | Low      |
| Wang et al., Jun 2020         | **** | * | ** | Low      |
| Zhang et al., Jun 2020        | **   | * | *  | Moderate |
| Jiang et al., Jul 2020        | **** | * | ** | Low      |
| Li et al., Jul 2020           | **** | * | ** | Low      |
| Wei et al., Jul 2020          | **** | * | ** | Low      |
| Xu et al., Jul 2020           | **   | * | *  | Moderate |
| Zhang et al., Jul 2020        | **   | * | *  | Moderate |
| Ferguson et al. Aug 2020      | **   | * | *  | Moderate |

Supplemental file: Funnel plots

Figure 4A: Lymphopenia

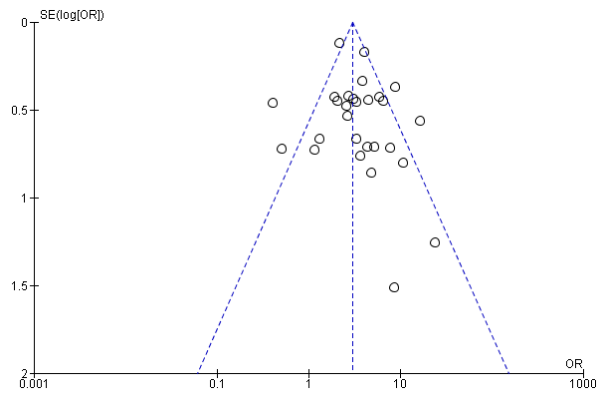

Figure 4B: Thrombocytopenia

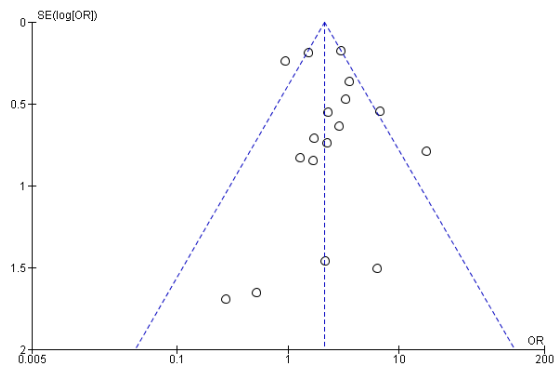

Figure 4C: Elevated C-reactive protein (CRP)

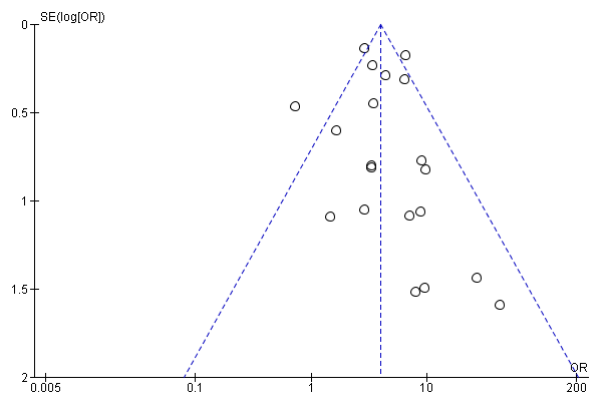

**Figure 4D: Elevated Procalcitonin**

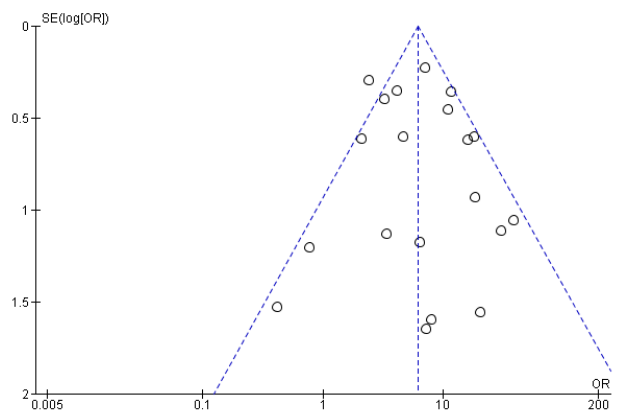

**Figure 4E: Elevated Creatinine Kinase**

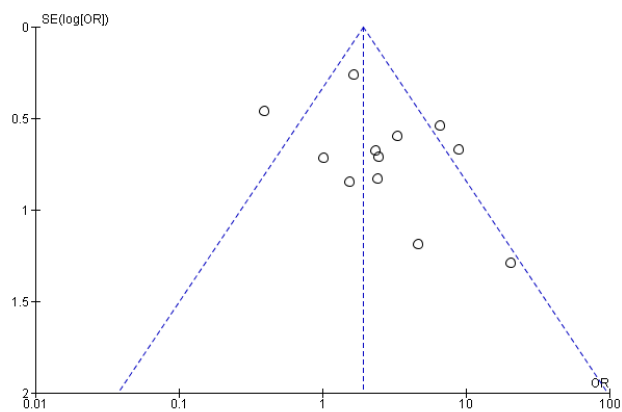

**Figure 4F: Elevated Aspartate aminotransferase (AST)**

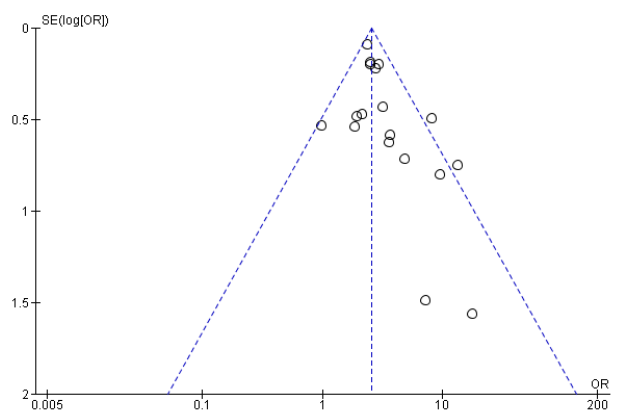

**Figure 4G: Elevated Alanine aminotransferase (ALT)**

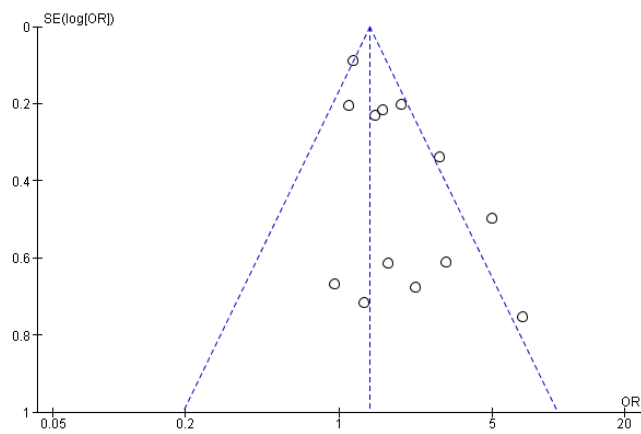

**Figure 4H: Elevated Creatinine**

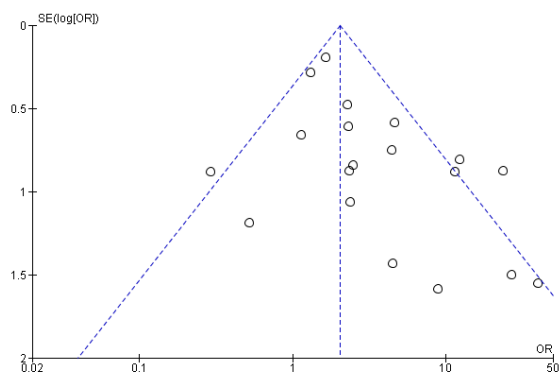

**Figure 4I: Elevated D-Dimer**

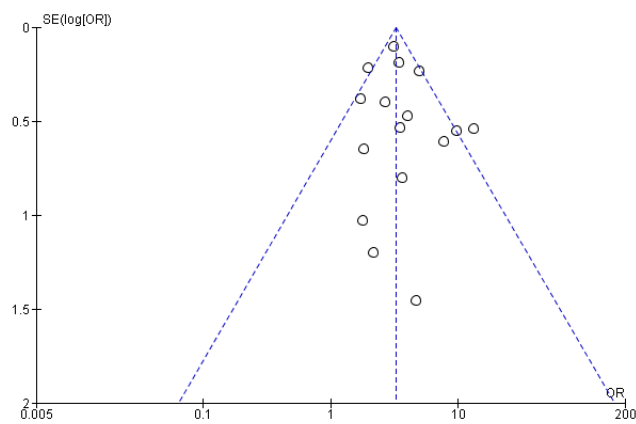

**Figure 4J: Elevated Lactate dehydrogenase (LDH)**

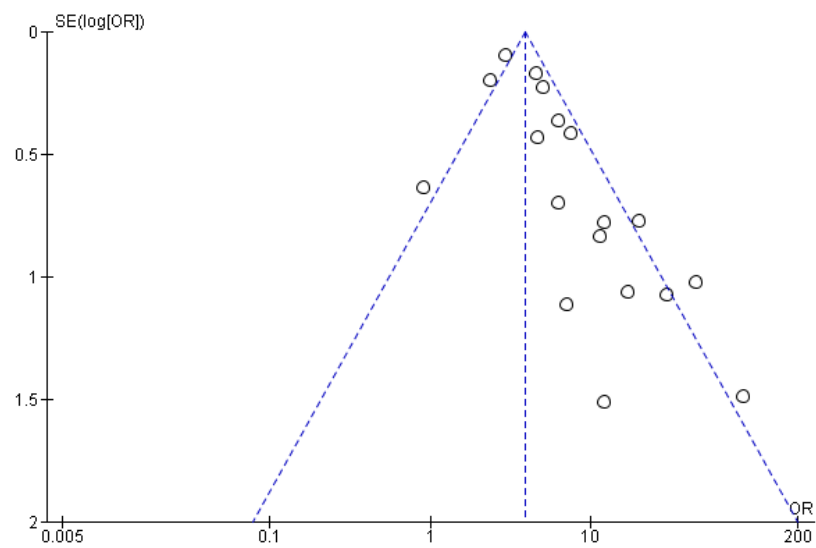

Supplement: inline-supplementary-material-1 [file inline-supplementary-material-1.pdf]
